# Supplementary material
Source: PubMed Central journal article supplement (PMC1892926)
Supplement: pnas_0607940104_3.pdf [file pnas_0607940104_3.pdf]

**Table 1. Transcripts derepressed in *KK* mutant seedlings as identified by microarray analysis<sup>a</sup>**

<sup>a</sup>Total RNAs were isolated from the 4-day-old Col-0 and *KK* seedlings germinated on medium containing 1% sucrose. Cy3- and Cy5-labeled cDNA probes were synthesized and hybridized to the *Arabidopsis* 3 oligonucleotide microarray (Agilent Technologies, Palo Alto, CA) according to the manufacturer's instructions and analyzed as described previously (1). The microarray analysis was performed with two independently isolated RNA samples. Transcripts that were more than 30-fold higher in *KK* seedlings than in Col-0 seedlings in both of the two independent experiments are listed along with four transcripts for transcription factors that were increased more than 4-fold. The raw data files plus the details of experimental conditions have been deposited in the public microarray database ([www.ebi.ac.uk/arrayexpress](http://www.ebi.ac.uk/arrayexpress)) under accession number E-MEXP-542.

<sup>b</sup>Ratio of the level of transcripts in *KK* seedlings relative to those in Col-0 seedlings. Means of results obtained with two independent RNA samples  $\pm$  SD are shown. Ole, oleosin protein family; 12S, 12S globulin seed storage protein family; 2S, 2S albumin seed storage protein family; TF, transcription factors.

1. Yoine M, Ohto M, Onai S, Mita S, Nakamura K (2006) *Plant J* 47:49-62.

| AGI Code  | Gene description                                             | Group      | <i>KK /Col-0b</i> |      |
|-----------|--------------------------------------------------------------|------------|-------------------|------|
|           |                                                              |            | Average fold      | S.D. |
| At3g27660 | oleosin S2 ( <b>OleS2</b> )                                  | <b>Ole</b> | 179               | 3    |
| At5g44120 | 12S seed storage protein ( <b>CRA1</b> )                     | <b>12S</b> | 131               | 65   |
| At3g01570 | oleosin S1 ( <b>OleS1</b> )                                  | <b>Ole</b> | 128               | 6    |
| At1g47540 | trypsin inhibitor putative, AtTI2-like                       |            | 118               | 6    |
| At4g28520 | 12S seed storage protein ( <b>CRC</b> )                      | <b>12S</b> | 113               | 14   |
| At4g27170 | 2S seed storage protein 4 ( <b>At2S-4</b> )                  | <b>2S</b>  | 100               | 7    |
| At5g54740 | 2S seed storage proteins ( <b>At2S-5</b> )                   | <b>2S</b>  | 95                | 1    |
| At3g22640 | cupin family protein                                         |            | 82                | 5    |
| At4g26740 | embryo-specific protein 1 ( <b>ATS1</b> )                    |            | 80                | 7    |
| At4g25140 | oleosin S3 ( <b>OleS3</b> )                                  | <b>Ole</b> | 75                | 10   |
| At1g03880 | 12S seed storage protein ( <b>CRB</b> )                      | <b>12S</b> | 74                | 5    |
| At5g51210 | oleosin S5 ( <b>OleS5</b> )                                  | <b>Ole</b> | 74                | 15   |
| At2g31985 | expressed protein                                            |            | 73                | 5    |
| At5g40420 | oleosin S4 ( <b>OleS4</b> )                                  | <b>Ole</b> | 71                | 3    |
| At5g55240 | embryo-specific protein, ATS1-like                           |            | 69                | 1    |
| At4g27150 | 2S seed storage protein 2 ( <b>At2S-2</b> )                  | <b>2S</b>  | 69                | 3    |
| At1g03890 | cupin family protein                                         |            | 68                | 5    |
| At5g47670 | LEC1-like ( <b>L1L</b> )                                     | <b>TF</b>  | 65                | 28   |
| At4g27140 | 2S seed storage protein 1( <b>At2S-1</b> )                   | <b>2S</b>  | 65                | 3    |
| At2g28490 | cupin family protein                                         |            | 62                | 5    |
| At2g15010 | thionin, putative                                            |            | 60                | 37   |
| At5g27200 | acyl carrier protein ( <b>ACP5</b> )                         |            | 60                | 7    |
| At1g48130 | peroxiredoxin ( <b>PER1</b> )                                |            | 58                | 8    |
| At3g28150 | expressed protein                                            |            | 56                | 18   |
| At4g30880 | seed storage, lipid transfer protein (LTP) family protein    |            | 56                | 10   |
| At5g01300 | phosphatidylethanolamine-binding family protein              |            | 54                | 45   |
| At3g12203 | serine carboxypeptidase S10 family protein ( <b>SCPL17</b> ) |            | 51                | 1    |
| At5g05290 | expansin ( <b>EXP2</b> )                                     |            | 48                | 5    |
| At3g44460 | bZIP transcription factor ( <b>DPBF2/AtbZIP67</b> )          | <b>TF</b>  | 47                | 6    |
| At1g05510 | expressed protein                                            |            | 46                | 12   |
| At3g63040 | expressed protein                                            |            | 45                | 10   |
| At2g34700 | pollen Ole e 1 allergen and extensin family protein          |            | 40                | 2    |
| At1g67100 | LOB domain protein 40 ( <b>LBD40</b> )                       | <b>TF</b>  | 40                | 7    |
| At1g48800 | terpene synthase/cyclase family protein                      |            | 36                | 6    |
| At2g05580 | unknown protein                                              |            | 36                | 3    |
| At3g24650 | <b>ABI3</b>                                                  | <b>TF</b>  | 8                 | 1    |
| At2g41070 | <b>EEL/DPBF4</b>                                             | <b>TF</b>  | 7                 | 0    |
| At3g26790 | <b>FUS3</b>                                                  | <b>TF</b>  | 5                 | 1    |
| At3g54320 | <b>WR11/ASML1</b>                                            | <b>TF</b>  | 4                 | 0    |
