# Supplementary material
Source: PubMed Central journal article supplement (PMC1892926)

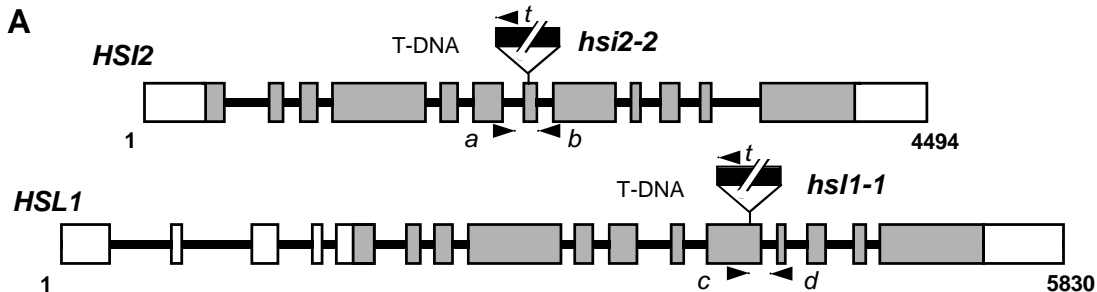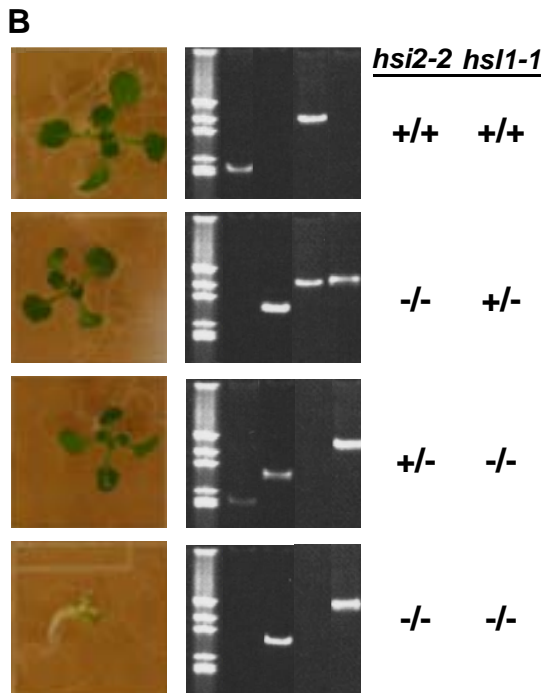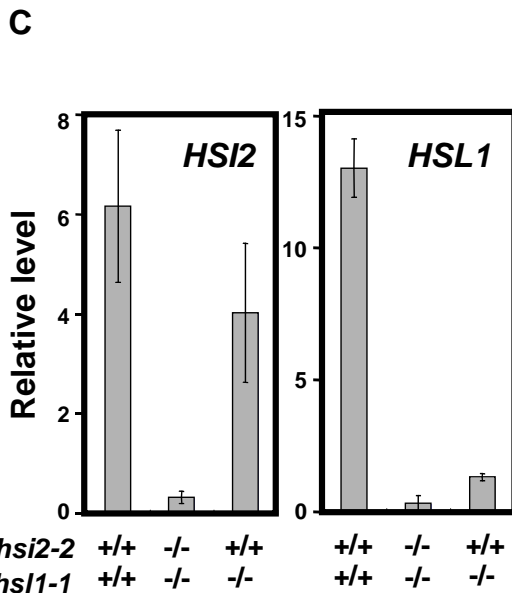

primer pair  $\frac{a}{b} \quad \frac{c}{d}$   
 $\frac{t}{t}$

Supplement: pnas_0607940104_1.pdf [file pnas_0607940104_1.pdf]

**A** Col-0

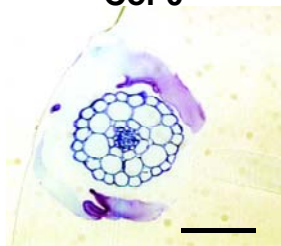

**KK**

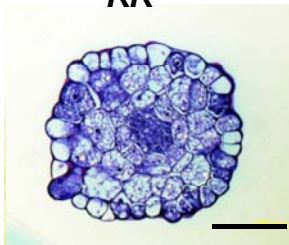

**B** Col-0

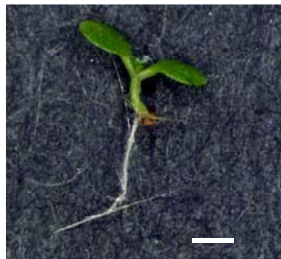

**KK**

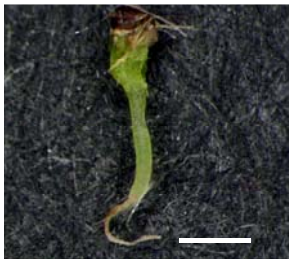

Supplement: pnas_0607940104_2.pdf [file pnas_0607940104_2.pdf]
